# Supplementary material
Source: Springer Nature journal article supplement (https://www.springermedizin.de/resource/supplementary/12967_2009_375_MOESM4_ESM.pdf/9576334)

**Belatacept**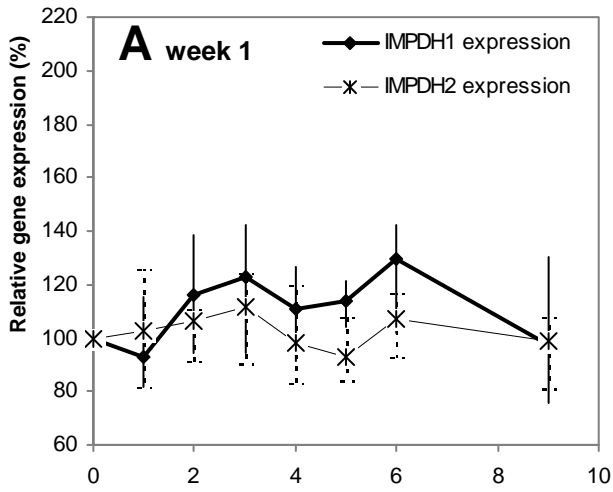**Cyclosporine**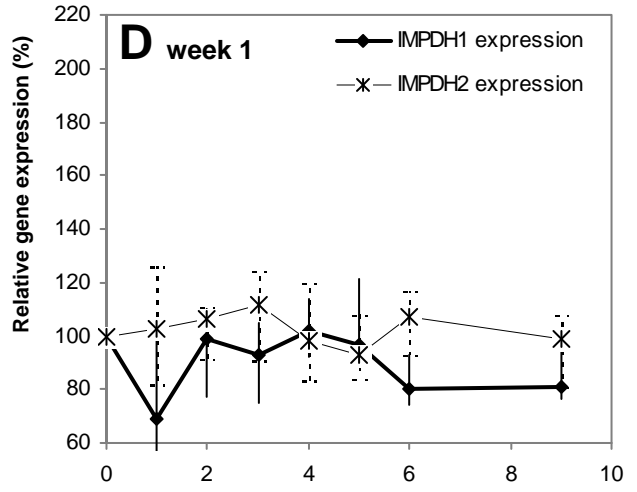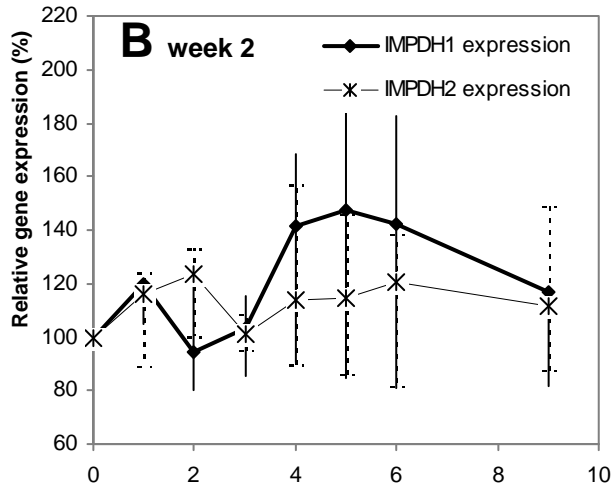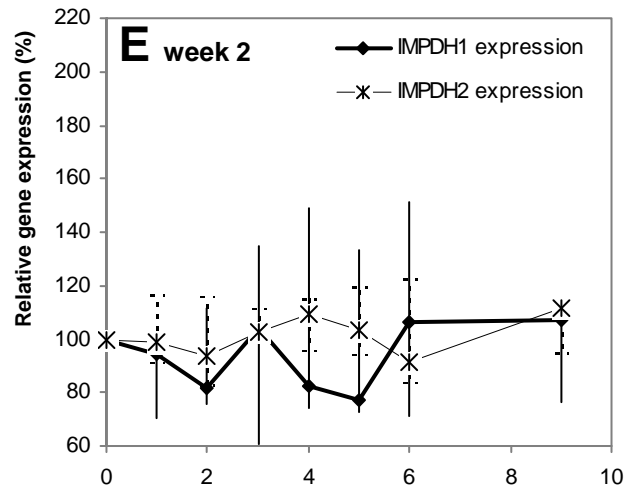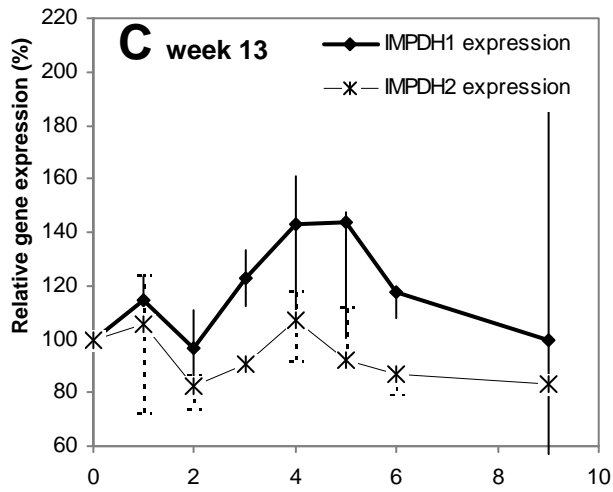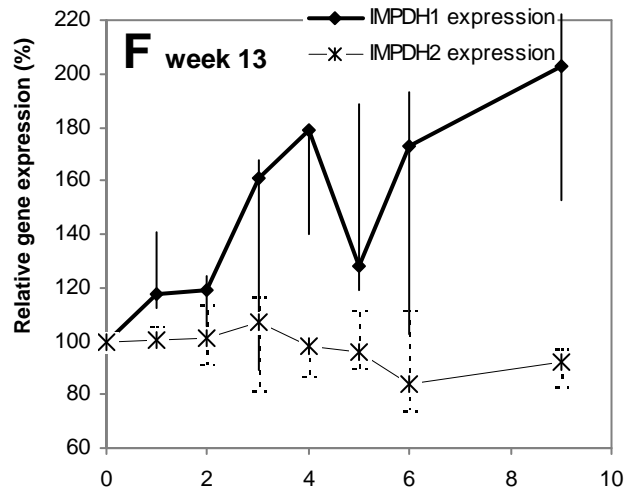**Hours post-dose**

Supplement: MOESM4 [file 9576334]
